# Supplementary material for: First-trimester use of antiseizure medications and the risk of miscarriage: a population-based cohort study
Source: PubMed Central journal article supplement (PMC11287565; doi:10.1136/jnnp-2023-333149), 2024-05-22
Supplement: jnnp-2023-333149supp001.pdf [file jnnp-2023-333149supp001.pdf]

## Supplementary material

Supplementary methods:

### **Methods S1: Uncertain pregnancies in the CPRD Pregnancy Register**

A substantial proportion of pregnancies in the CPRD GOLD Pregnancy Register are uncertain, either having no identified outcome, or they overlap (“conflict”) with other pregnancies. Ignoring these records potentially excludes periods when women were pregnant. Work by the CPRD Pregnancy Register developers[16] has investigated the frequency of various scenarios explaining unknown/conflicting pregnancies, and in line with their advice for drug safety studies we performed the following actions:

1. Utilise linked data to obtain additional outcomes

The CPRD Pregnancy Register only utilises data from primary care record. We used HES data (HES APC, HES Maternity, HES Outpatients and HES Procedures) to identify outcomes (delivery, miscarriage, or termination of pregnancy). For deliveries, records within 266 days of pregnancy start plus 4 weeks (38 weeks) were retained, and for early pregnancy losses, records within 140 days from first antenatal record (20 weeks) were retained. HES records were only available for those with linked data (N=596,218 (48.5%)). We used the approach outlined in the CPRD Pregnancy Register validation study.[25]

2. Merging conflicting pregnancies episodes

We merged conflicting episodes which are consistent with the pregnancy being real, but split into separate episodes by the rules of the Pregnancy Register algorithm.

3. Excluding episodes which are likely to be derived from historical data

There is evidence to suggest that historical outcomes being recorded by the GP during an ongoing pregnancy may explain a sizeable proportion of the uncertain episodes generated by the algorithm. This can lead to true pregnancies being split by the algorithm and depending on the timing this will either generate an additional episode with outcome missing or two separate episodes with outcomes.

### **Methods S2: ASM prescriptions: further detail on data cleaning procedures**

#### **Cleaning procedure applied to the ASM prescriptions**

Implausible values for number of tablets taken per day and total quantity of tablets prescribed were changed to missing, and a hot-decking approach was used to singly impute missing values for quantity and number of tablets taken per day, using similar prescriptions first within the individual and then similar individuals.[26] Prescription length was calculated by dividing the quantity of tablets by the number taken per day.

We used an imputation approach called “Hot Decking” to address missing total quantity of tablets prescribed and number of tablets taken per day (referred to as DD). Hot Decking involves replacing missing data with observed data from a similar unit, or strata, for example patients of the same age and gender. The modal numeric daily dose of the observed data, within the chosen strata, was used to replace missing numeric daily dose within that same strata. An algorithm was developed which reviewed each therapy record and imputed missing values, first where the strata were based on data within- persons, then where the strata were based on data from groups of patients.

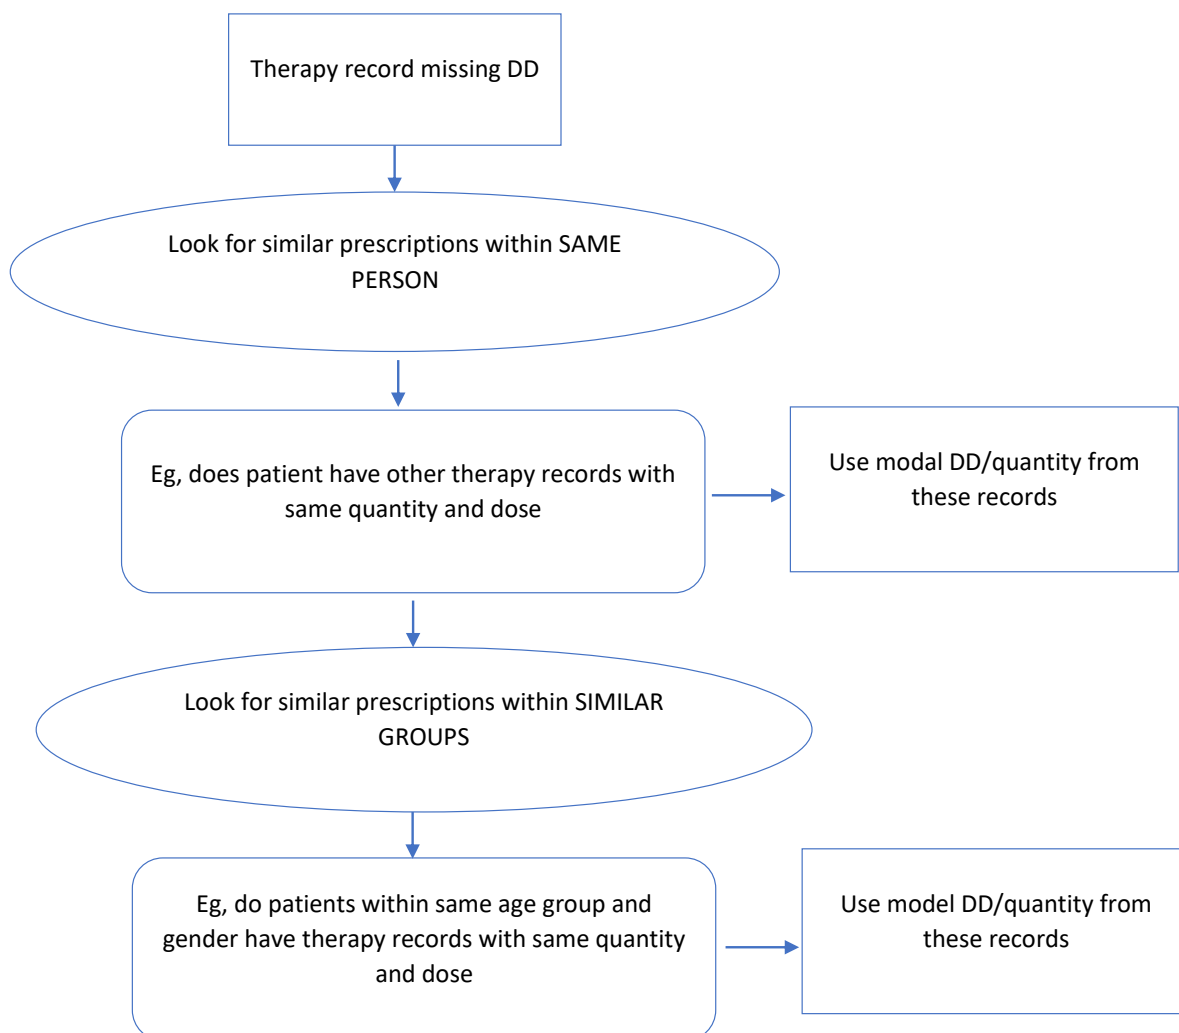

We considered women exposed to a drug in any period if the length of a prescription for the drug overlapped with that time period.

#### Dose Distribution Within Each Dose Range Category for all Antiseizure prescriptions

We classified each prescription as low, medium and high dose. The cut-offs for these dose categories were developed from all pre-pregnancy prescriptions; we calculated quartiles of distributions of daily doses in milligrams, separately for each individual drug, and then combined this information in a single dose level variable (1st quartile defined as low doses, 2nd and third quartiles as moderate doses, 4th quartile as high doses). See the table below for cut-offs for each ASM drug type based on this approach. Daily dose for the first trimester was then identified, using these cut-offs. In case of pregnancies where prescriptions had been issued at different dose levels during the same trimester, we used the highest daily dose prescribed.

#### **Polytherapy**

Polytherapy was defined as having prescriptions of two or more ASMs during the first trimester. Where women have prescriptions for more than one type of drug on different days, we classified them according to the drug class prescribed first.

#### **ASM type**

In the “other” ASM type category, the ASMs were: brivaracetam, eslicarbazepine, ethosuximide, felbamate, lacosamide, oxcarbazepine, perampanel, phenobarbital, primidone, retigabine, rufinamide, stiripentol, sulthiame, tiagabine, vigabatrin, zonisamide, beclamide, mesuximide, phenacemide, ethotoin, pheneturide, carisbamate, cenobamate, barbexaclone, ethadione, progabide, clobazam.

| Drug            | Total Rx | Level  | Value (mg/day)  | N    | Minimum | 25% Q1 | 50% Median | 75% Q3 | Maximum |
|-----------------|----------|--------|-----------------|------|---------|--------|------------|--------|---------|
| carbamazepine   | 18534    | Low    | <=300           | 724  | 50      | 200    | 200        | 200    | 300     |
|                 |          | Medium | >300 to <=800   | 1658 | 400     | 400    | 600        | 800    | 800     |
|                 |          | High   | >800            | 268  | 900     | 1200   | 1200       | 1600   | 480000  |
| lamotrigine     | 27370    | Low    | <=100           | 970  | 10      | 50     | 100        | 100    | 100     |
|                 |          | Medium | >100 to <=200   | 1111 | 125     | 200    | 200        | 200    | 200     |
|                 |          | High   | >200            | 610  | 225     | 400    | 400        | 400    | 80000   |
| phenobarbital   | 595      | Low    | <=60            | 29   | 15      | 30     | 60         | 60     | 60      |
|                 |          | Medium | >60 to <=180    | 19   | 90      | 90     | 120        | 120    | 180     |
|                 |          | High   | >180            | 15   | 210     | 300    | 500        | 500    | 1500    |
| valproate       | 15104    | Low    | <=600           | 772  | 100     | 400    | 500        | 600    | 600     |
|                 |          | Medium | >600 to <=1200  | 956  | 700     | 800    | 1000       | 1000   | 1200    |
|                 |          | High   | >1200           | 421  | 1250    | 1500   | 2000       | 2000   | 500000  |
| brivaracetam    | 17       | Low    | <=200           | 1    | 200     | 200    | 200        | 200    | 200     |
|                 |          | Medium | >200 to <=200   | 0    | 700     | 800    | 1000       | 1000   | 1200    |
|                 |          | High   | >200            | 0    | 1250    | 1500   | 2000       | 2000   | 500000  |
| eslicarbazepine | 88       | Low    | <=800           | 4    | 800     | 800    | 800        | 800    | 800     |
|                 |          | Medium | >800 to <=1200  | 4    | 1200    | 1200   | 1200       | 1200   | 1200    |
|                 |          | High   | >1200           | 2    | 1600    | 1600   | 1600       | 1600   | 1600    |
| ethosuximide    | 305      | Low    | <=750           | 12   | 250     | 500    | 500        | 750    | 750     |
|                 |          | Medium | >750 to <=1500  | 22   | 1000    | 1000   | 1000       | 1250   | 1500    |
|                 |          | High   | >1500           | 8    | 2000    | 2000   | 3500       | 5000   | 5000    |
| gabapentin      | 13643    | Low    | <=300           | 819  | 100     | 300    | 300        | 300    | 300     |
|                 |          | Medium | >300 to <=1200  | 1564 | 400     | 900    | 900        | 900    | 1200    |
|                 |          | High   | >1200           | 742  | 1350    | 1800   | 1800       | 2400   | 540000  |
| lacosamide      | 276      | Low    | <=200           | 12   | 100     | 150    | 200        | 200    | 200     |
|                 |          | Medium | >200 to <=400   | 15   | 300     | 300    | 300        | 400    | 400     |
|                 |          | High   | >400            | 1    | 600     | 600    | 600        | 600    | 600     |
| levetiracetam   | 8150     | Low    | <=1000          | 368  | 250     | 750    | 1000       | 1000   | 1000    |
|                 |          | Medium | >1000 to <=2000 | 373  | 1250    | 1500   | 2000       | 2000   | 2000    |
|                 |          | High   | >2000           | 114  | 2250    | 3000   | 3000       | 4000   | 500000  |
| oxcarbazepine   | 205      | Low    | <=600           | 12   | 300     | 600    | 600        | 600    | 600     |
|                 |          | Medium | >600 to <=1200  | 10   | 750     | 1200   | 1200       | 1200   | 1200    |
|                 |          | High   | >1200           | 3    | 1800    | 1800   | 1800       | 1800   | 1800    |
| perampanel      | 47       | Low    | <=6             | 2    | 2       | 2      | 4          | 6      | 6       |

|             |       |        |                 |      |          |      |      |      |        |
|-------------|-------|--------|-----------------|------|----------|------|------|------|--------|
|             |       | Medium | >6 to <=8       | 2    | 8        | 8    | 8    | 8    | 8      |
|             |       | High   | >8              | 1    | 12       | 12   | 12   | 12   | 12     |
| phenytoin   | 2295  | Low    | <=200           | 92   | 25       | 100  | 200  | 200  | 200    |
|             |       | Medium | >200 to <=300   | 116  | 300      | 300  | 300  | 300  | 300    |
|             |       | High   | >300            | 46   | 400      | 400  | 400  | 400  | 90000  |
|             |       |        |                 |      |          |      |      |      |        |
| pregabalin  | 12634 | Low    | <=150           | 1039 | 21.42857 | 75   | 150  | 150  | 150    |
|             |       | Medium | >150 to <=300   | 484  | 200      | 225  | 300  | 300  | 300    |
|             |       | High   | >300            | 411  | 375      | 450  | 600  | 600  | 270000 |
| primidone   | 59    | Low    | <=500           | 7    | 500      | 500  | 500  | 500  | 500    |
|             |       | Medium | >500 to <=500   | 0    | 200      | 225  | 300  | 300  | 300    |
|             |       | High   | >500            | 1    | 1500     | 1500 | 1500 | 1500 | 1500   |
| retigabine  | 6     | Low    | <=600           | 1    | 600      | 600  | 600  | 600  | 600    |
|             |       | Medium | >600 to <=600   | 0    | 200      | 225  | 300  | 300  | 300    |
|             |       | High   | >600            | 0    | 1500     | 1500 | 1500 | 1500 | 1500   |
| rufinamide  | 0     |        |                 |      |          |      |      |      |        |
| stiripentol | 42    | Low    | <=500           | 1    | 500      | 500  | 500  | 500  | 500    |
|             |       | Medium | >500 to <=500   | 0    | 200      | 225  | 300  | 300  | 300    |
|             |       | High   | >500            | 0    | 1500     | 1500 | 1500 | 1500 | 1500   |
| tiagabine   | 31    | Low    | <=15            | 1    | 10       | 10   | 10   | 10   | 10     |
|             |       | Medium | >15 to <=32.5   | 2    | 20       | 20   | 20   | 20   | 20     |
|             |       | High   | >32.5           | 1    | 45       | 45   | 45   | 45   | 45     |
| topiramate  | 5087  | Low    | <=50            | 397  | 15       | 30   | 50   | 50   | 50     |
|             |       | Medium | >50 to <=100    | 309  | 60       | 100  | 100  | 100  | 100    |
|             |       | High   | >100            | 186  | 125      | 200  | 200  | 400  | 1875   |
| vigabatrin  | 188   | Low    | <=1250          | 6    | 1000     | 1000 | 1000 | 1000 | 1250   |
|             |       | Medium | >1250 to <=4000 | 16   | 1500     | 2000 | 3000 | 4000 | 4000   |
|             |       | High   | >4000           | 0    | 125      | 200  | 200  | 400  | 1875   |
| zonisamide  | 470   | Low    | <=100           | 21   | 25       | 50   | 100  | 100  | 100    |
|             |       | Medium | >100 to <=200   | 22   | 150      | 200  | 200  | 200  | 200    |
|             |       | High   | >200            | 13   | 300      | 300  | 400  | 400  | 500    |
| clonazepam  | 2427  | Low    | <=.5            | 100  | 0.25     | 0.5  | 0.5  | 0.5  | 0.5    |
|             |       | Medium | >.5 to <=2      | 209  | 0.75     | 1    | 1    | 2    | 2      |
|             |       | High   | >2              | 45   | 2.5      | 3    | 4    | 6    | 16     |





**Methods S3:** Detailed definitions of indications: women could have more than one indication

| Indication                                                        | Derivation                                                                                                                                                                                                                                                                                                                                                                                                                                                                                                                                                                                                                                                                      |
|-------------------------------------------------------------------|---------------------------------------------------------------------------------------------------------------------------------------------------------------------------------------------------------------------------------------------------------------------------------------------------------------------------------------------------------------------------------------------------------------------------------------------------------------------------------------------------------------------------------------------------------------------------------------------------------------------------------------------------------------------------------|
| <b>Epilepsy</b>                                                   | One of the following: <ul style="list-style-type: none"> <li>• Diagnosis of epilepsy according to the pre-specified algorithm (see Figure S1), OR;</li> <li>• Epilepsy-specific ASMSs: Epilim, Brivaracetam, Brivaracetam, Eslicarbazepine, Ethosuximide, Felbamate, Fenfluramine, Lacosamide, Levetiracetam, Mesuximide, Oxcarbazepine, Perampanel, Phenobarbital, Phenytoin, Retigabine, Rufinamide, Stiripentol, Sulthiame, Tiagabine, Vigabatrin, Zonisamide, OR;</li> <li>• Epilepsy-specific co-prescribing on the same day: 1) Clobazam and an ASMS or 2) rectal administration of diazepam and an ASMS or 3) intranasal administration of Midazolam and ASMS</li> </ul> |
| <b>Bipolar disorder</b>                                           | One of the following: <ul style="list-style-type: none"> <li>• Read code in CPRD or ICD-10 code in HES (any diagnostic field) for bipolar, anytime prior to pregnancy start date OR;</li> <li>• Mood-disorder specific co-prescribing (1-Quetiapine and [valproate or lamotrigine or carbamazepine] or 2-lithium and [valproate or lamotrigine or carbamazepine]) OR;</li> <li>• The mood disorder-specific ASMS Depakote.</li> </ul>                                                                                                                                                                                                                                           |
| <b>Other somatic conditions</b>                                   |                                                                                                                                                                                                                                                                                                                                                                                                                                                                                                                                                                                                                                                                                 |
| Neuropathic pain (including diabetic neuropathy) and fibromyalgia | A READ code in CPRD or ICD-10 code for a neuropathic pain disorder, anytime prior to pregnancy start.                                                                                                                                                                                                                                                                                                                                                                                                                                                                                                                                                                           |
| Migraine prophylaxis                                              | A READ code in CPRD or ICD-10 code for migraines, anytime prior to pregnancy start.                                                                                                                                                                                                                                                                                                                                                                                                                                                                                                                                                                                             |
| Restless legs syndrome                                            | A READ code for restleg leg syndrome in CPRD , anytime prior to pregnancy start.                                                                                                                                                                                                                                                                                                                                                                                                                                                                                                                                                                                                |
| Essential tremors                                                 | A READ code for essential tremors in CPRD , anytime prior to pregnancy start.                                                                                                                                                                                                                                                                                                                                                                                                                                                                                                                                                                                                   |
| <b>Other psychiatric conditions</b>                               |                                                                                                                                                                                                                                                                                                                                                                                                                                                                                                                                                                                                                                                                                 |
| Generalised anxiety disorder                                      | A Read code in CPRD on the same day, anytime prior to pregnancy start date.                                                                                                                                                                                                                                                                                                                                                                                                                                                                                                                                                                                                     |
| Depression and other affective disorders                          | A READ code in CPRD for depression , anytime prior to pregnancy start.                                                                                                                                                                                                                                                                                                                                                                                                                                                                                                                                                                                                          |
| schizophrenia/ /psychosis                                         | A READ code in CPRD for schizophrenia, anytime prior to pregnancy start.                                                                                                                                                                                                                                                                                                                                                                                                                                                                                                                                                                                                        |
| Other off-label psychiatric use                                   | Where none of the above indications were identified, yet there was prescription of antipsychotics, lithium, or antidepressants                                                                                                                                                                                                                                                                                                                                                                                                                                                                                                                                                  |



**Methods S4:** Description of sensitivity analyses conducted

| <b>Possible bias</b>                            | <b>Analysis</b>                                                                      | <b>Description</b>                                                                                                                                                                                                                                                                                                                                                                                             |
|-------------------------------------------------|--------------------------------------------------------------------------------------|----------------------------------------------------------------------------------------------------------------------------------------------------------------------------------------------------------------------------------------------------------------------------------------------------------------------------------------------------------------------------------------------------------------|
| <b>Confounding by history of pregnancy loss</b> | <i>Restriction to first pregnancies</i>                                              | To account for potential residual confounding by history of pregnancy loss, we repeated the main analyses, restricted the first pregnancy for each woman in the CPRD Pregnancy Register.                                                                                                                                                                                                                       |
| <b>Exposure misclassification</b>               | <i>Redefine primary exposure as two ASM prescriptions in first trimester</i>         | To be confident a patient is using medication and has not discontinued medication prior to pregnancy, we required the exposed group to have two ASM prescriptions of the same type in the first trimester. The majority of ASM prescriptions in the UK are 28 days, meaning women using ASMs consistently should require at least three prescriptions during their first trimester.                            |
|                                                 | <i>Splitting exposed group into new and prevalent users</i>                          | To explore whether the risk of first trimester exposure differed according to whether the woman was a new or prevalent user, we split the main exposure group into new and prevalent users, where “new users” were those women without a prescription in the previous 12 months and “prevalent users” were those with use in the previous 12 months.                                                           |
| <b>Outcome misclassification</b>                | <i>Restricting to women with linked HES data</i>                                     | To explore whether there was under-ascertainment of miscarriage, we restricted to patients with linked HES data, where we were able to supplement the CPRD pregnancy register with hospital records of miscarriage.                                                                                                                                                                                            |
|                                                 | <i>Comparison of included pregnancies with those excluded due to missing outcome</i> | In line with recommendations from the CPRD Pregnancy Register developers, we did not carry out a multiple imputation analysis on pregnancies with unknown outcome, as there are not sufficient predictors of the missing pregnancy outcome in the dataset.[16] As such, we compared the characteristics of women include in the cohort, and those women excluded due to their pregnancy outcome being unknown. |

**Figure S1:** Flow diagrams to identify patients with epilepsy in CPRD and their linked datasets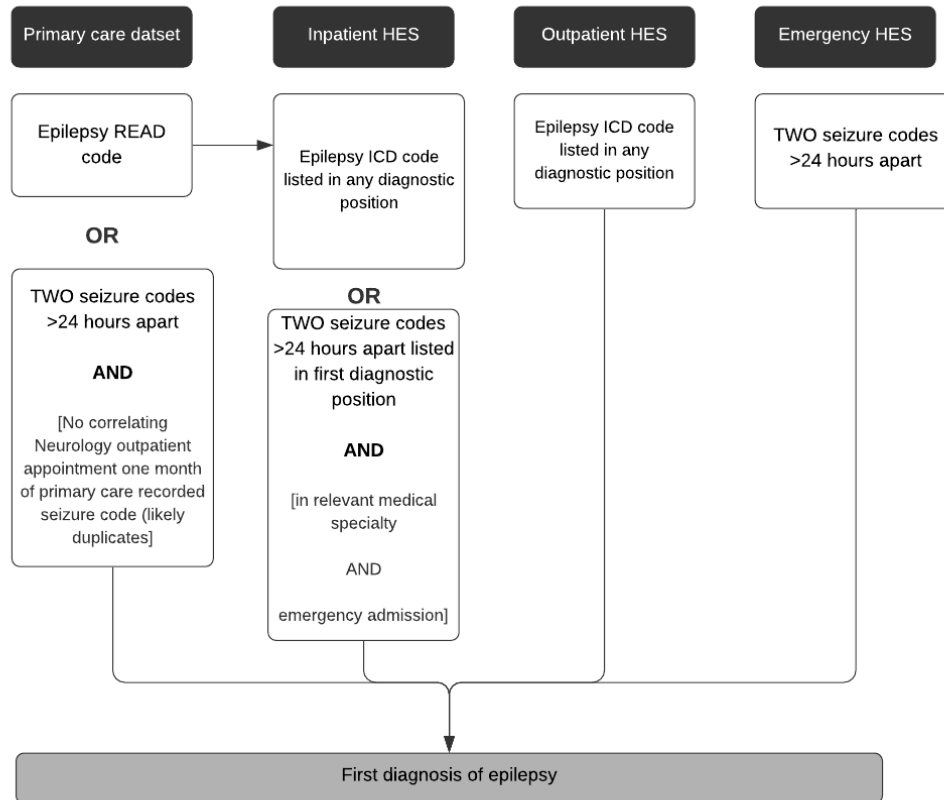

**Table S1:** Number of miscarriages, total pregnancies and proportion with miscarriages, in exposed and unexposed and adjusted HRs of miscarriage associated with antiepileptic medications treatment in first trimester of pregnancy, overall and stratified by ASM indication.

| Indication                           | Comparison group        | N miscarriages | Total person years | Rate per 10,000 person years | Total pregnancies | Percent | Unadjusted HR (95% CI) | Fully adjusted* HR (95% CI) | Fully adjusted* + ethnicity HR (95% CI) |
|--------------------------------------|-------------------------|----------------|--------------------|------------------------------|-------------------|---------|------------------------|-----------------------------|-----------------------------------------|
| <b>All women</b>                     | Unexposed               | 124285         | 388989.1           | 31.95                        | 1016535           | 12.23   | 1.00 (ref)             | 1.00 (ref)                  | 1.00 (ref)                              |
|                                      | First trimester exposed | 1139           | 2932.9             | 38.84                        | 7832              | 14.54   | 1.20 (1.13-1.27)       | 1.06 (1.00-1.13)            | 1.05 (0.97-1.13)                        |
| <b>Epilepsy</b>                      | Unexposed               | 1133           | 3219.97            | 35.19                        | 8593              | 13.19   | 1.00 (ref)             | 1.00 (ref)                  | 1.00 (ref)                              |
|                                      | First trimester exposed | 622            | 1804.01            | 34.48                        | 4725              | 13.16   | 0.99 (0.89-1.09)       | 0.98 (0.89-1.08)            | 0.97 (0.86-1.08)                        |
| <b>Bipolar and other psychiatric</b> | Unexposed               | 49222          | 137596.7           | 35.77                        | 365484            | 13.47   | 1.00 (ref)             | 1.00 (ref)                  | 1.00 (ref)                              |
|                                      | First trimester exposed | 787            | 1845.69            | 42.64                        | 5002              | 15.73   | 1.18 (1.10-1.26)       | 1.08 (1.00-1.16)            | 1.07 (0.98-1.17)                        |
| <b>Other somatic</b>                 | Unexposed               | 18163          | 50446.56           | 36                           | 132354            | 13.72   | 1.00 (ref)             | 1.00 (ref)                  | 1.00 (ref)                              |
|                                      | First trimester exposed | 360            | 862.9              | 41.72                        | 2313              | 15.56   | 1.14 (1.03-1.26)       | 1.04 (0.93-1.16)            | 1.05 (0.92-1.19)                        |

\*Adjusted for: maternal age, year of pregnancy start, IMD, history of pregnancy loss, epilepsy, bipolar, other psychiatric conditions, other somatic conditions.



**Table S2:** Post-hoc analysis to investigate exposure discordant pregnancies

| Indication                                               |           | Main analysis: women with at least two pregnancies where at least two were exposure discordant |                         |                  | Restricted dataset of 1st two pregnancies in cohort (Restricted cohort) |                         |                  | Discordant sample restricted to women who took ASMs in the second pregnancy (Restricted cohort 2). |                         |                  | Discordant sample restricted to women who took ASMs in the first pregnancy (Restricted cohort 3) |                         |                   |
|----------------------------------------------------------|-----------|------------------------------------------------------------------------------------------------|-------------------------|------------------|-------------------------------------------------------------------------|-------------------------|------------------|----------------------------------------------------------------------------------------------------|-------------------------|------------------|--------------------------------------------------------------------------------------------------|-------------------------|-------------------|
|                                                          |           | Total N                                                                                        | Number (%) miscarriages | HR (95% CI)      | Total N                                                                 | Number (%) miscarriages | HR (95% CI)      | Total N                                                                                            | Number (%) miscarriages | HR (95% CI)      | Total N                                                                                          | Number (%) miscarriages | HR (95% CI)       |
| <b>All women</b>                                         | Unexposed | 3216                                                                                           | 450 (14.0)              | 1.00 (ref)       | 2320                                                                    | 335 (14.4)              | 1.00 (ref)       | 1993                                                                                               | 289(68.5)               | 1.00 (ref)       | 327                                                                                              | 46 (33.8)               | 1.00 (ref)        |
|                                                          | Exposed   | 2039                                                                                           | 381 (18.7)              | 1.28 (1.10-1.49) | 1124                                                                    | 223 (19.8)              | 1.19 (0.94-1.52) | 713                                                                                                | 133 (31.5)              | 0.71 (0.48-1.05) | 411                                                                                              | 90 (66.2)               | 2.33 (1.38-3.95)  |
| <b>Women with epilepsy</b>                               | Unexposed | 523                                                                                            | 63 (12.1)               | 1.00 (ref)       | 318                                                                     | 37 (11.6)               | 1.00 (ref)       | 168                                                                                                | 24 (38.1)               | 1.00 (ref)       | 150                                                                                              | 13 (22.0)               | 1.00 (ref)        |
|                                                          | Exposed   | 712                                                                                            | 132 (18.5)              | 1.47 (1.03-2.09) | 429                                                                     | 85 (19.8)               | 1.93 (1.10-3.37) | 221                                                                                                | 39 (61.9)               | 0.52 (0.13-2.08) | 208                                                                                              | 46 (78.0)               | 3.85 (1.44-10.30) |
| <b>Women with bipolar or other psychiatric disorders</b> | Unexposed | 2253                                                                                           | 319 (14.2)              | 1.00 (ref)       | 1521                                                                    | 230 (15.1)              | 1.00 (ref)       | 1268                                                                                               | 190 (64.2)              | 1.00 (ref)       | 253                                                                                              | 40 (41.2)               | 1.00 (ref)        |
|                                                          | Exposed   | 1628                                                                                           | 303 (18.6)              | 1.23 (1.04-1.46) | 851                                                                     | 163 (19.2)              | 1.09 (0.82-1.46) | 589                                                                                                | 106 (35.8)              | 0.62 (0.38-1.02) | 262                                                                                              | 57 (58.8)               | 1.91 (1.04-3.50)  |
| <b>Women with other somatic conditions</b>               | Unexposed | 931                                                                                            | 141 (15.2)              | 1.00 (ref)       | 568                                                                     | 94 (16.6)               | 1.00 (ref)       | 455                                                                                                | 76 (58.5)               | 1.00 (ref)       | 113                                                                                              | 18 (40.9)               | 1.00 (ref)        |
|                                                          | Exposed   | 792                                                                                            | 140 (17.7)              | 1.22 (0.94-1.58) | 418                                                                     | 80 (19.1)               | 0.83 (0.52-1.31) | 284                                                                                                | 54 (41.5)               | 0.35 (0.15-0.82) | 134                                                                                              | 26 (59.1)               | 2.58 (1.16-5.75)  |

\*Adjusted for: age, IMD, epilepsy, bipolar, other psychiatric conditions, other somatic conditions.

To test whether the results from the discordant exposure analyses were susceptible to the influence of carry-over effects,[18] in this case where the outcome of the first pregnancy influences exposure in the second pregnancy, we performed a post-hoc sensitivity analysis. First, we restricted the sample to include only first two pregnancies for each woman. Analyses were run on this dataset as a whole (restricted cohort) to confirm comparability with our main analyses when using only the first two children in a family. We then repeated the analysis, restricting the exposure discordant group to those in which the woman discontinued ASMs in the first pregnancy and took ASMs in the second pregnancy (restricted cohort 2) and then repeated with further restriction of the exposure discordant group to only those in which the woman took ASMs in the first pregnancy and discontinued ASM use in the second pregnancy (restricted cohort 3). In the absence of 'asymmetrical' carry-over effects[18] we would expect similar HR estimates with value greater than 1 in both restricted cohort 2 and 3. Instead we see elevated HRs when mothers are exposed in the first pregnancy (restricted cohort 3) but not when mothers are exposed in the second pregnancy (restricted cohort 2). We interpret this to mean that the increased hazard of miscarriage following exposure to ASMs in exposure discordant pregnancy analyses could be explained by the ordering of which pregnancy was exposed and not necessarily the result of the ASM itself.

**Table S3:** Number of events, crude event rates (per 1000), crude IRRs and adjusted HRs for miscarriage to the dose during pregnancy, among those with any antiseizure medications treatment in first trimester.

| Indication                    | ASM type               | Dose   | N events | %     | Unadjusted HR    | Fully adjusted HR* (95% CI) |
|-------------------------------|------------------------|--------|----------|-------|------------------|-----------------------------|
| All                           | Lamotrigine (N=1916)   | Low    | 84       | 13.31 | 1.00 (ref)       | 1.00 (ref)                  |
|                               |                        | Medium | 109      | 13.26 | 1.01 (0.76-1.33) | 1.00 (0.76-1.31)            |
|                               |                        | High   | 60       | 12.96 | 0.97 (0.69-1.38) | 0.99 (0.71-1.39)            |
|                               | Carbamazepine (N=1523) | Low    | 43       | 14.88 | 1.00 (ref)       | 1.00 (ref)                  |
|                               |                        | Medium | 155      | 14.72 | 1.01 (0.74-1.39) | 1.16 (0.84-1.59)            |
|                               |                        | High   | 29       | 16.02 | 1.07 (0.70-1.63) | 1.31 (0.86-2.00)            |
|                               | Gabapentin (N=1224)    | Low    | 41       | 15.53 | 1.00 (ref)       | 1.00 (ref)                  |
|                               |                        | Medium | 98       | 16.42 | 1.03 (0.72-1.47) | 1.01 (0.70-1.46)            |
|                               |                        | High   | 62       | 17.08 | 1.06 (0.72-1.54) | 1.07 (0.73-1.57)            |
|                               | Valproate (N=1109)     | Low    | 42       | 10.77 | 1.00 (ref)       | 1.00 (ref)                  |
|                               |                        | Medium | 65       | 13    | 1.23 (0.82-1.84) | 1.19 (0.81-1.77)            |
|                               |                        | High   | 34       | 15.53 | 1.49 (0.94-2.37) | 1.49 (0.94-2.36)            |
| Epilepsy                      | Lamotrigine (N=1656)   | Low    | 59       | 11.92 | 1.00 (ref)       | 1.00 (ref)                  |
|                               |                        | Medium | 92       | 12.81 | 1.10 (0.79-1.52) | 1.07 (0.78-1.46)            |
|                               |                        | High   | 57       | 12.87 | 1.09 (0.74-1.61) | 1.05 (0.73-1.51)            |
|                               | Carbamazepine (N=1193) | Low    | 16       | 11.35 | 1.00 (ref)       | 1.00 (ref)                  |
|                               |                        | Medium | 125      | 14.16 | 1.28 (0.79-2.07) | 1.26 (0.81-1.95)            |
|                               |                        | High   | 26       | 15.38 | 1.36 (0.78-2.40) | 1.42 (0.83-2.42)            |
|                               | Gabapentin (N=75)      | Low    | 1        | 16.67 | 1.00 (ref)       | 1.00 (ref)                  |
|                               |                        | Medium | 4        | 11.76 | 0.85 (0.15-4.87) | 0.59 (0.03-12.57)           |
|                               |                        | High   | 6        | 17.14 | 1.06 (0.21-5.42) | 0.93 (0.05-19.11)           |
|                               | Valproate (N=930)      | Low    | 27       | 8.88  | 1.00 (ref)       | 1.00 (ref)                  |
|                               |                        | Medium | 56       | 13.15 | 1.53 (0.92-2.53) | 1.39 (0.84-2.29)            |
|                               |                        | High   | 32       | 16    | 1.89 (1.09-3.28) | 1.72 (1.00-2.96)            |
| Bipolar and other psychiatric | Lamotrigine (N=983)    | Low    | 50       | 14.62 | 1.00 (ref)       | 1.00 (ref)                  |
|                               |                        | Medium | 56       | 14.21 | 0.98 (0.67-1.41) | 0.99 (0.69-1.41)            |
|                               |                        | High   | 36       | 14.57 | 0.97 (0.63-1.50) | 0.98 (0.64-1.50)            |
|                               | Carbamazepine (N=764)  | Low    | 28       | 16.37 | 1.00 (ref)       | 1.00 (ref)                  |
|                               |                        | Medium | 89       | 17.91 | 1.11 (0.74-1.65) | 1.30 (0.87-1.96)            |
|                               |                        | High   | 19       | 19.79 | 1.21 (0.72-2.02) | 1.65 (0.97-2.82)            |
|                               | Gabapentin (N=1105)    | Low    | 39       | 17.26 | 1.00 (ref)       | 1.00 (ref)                  |
|                               |                        | Medium | 85       | 15.86 | 0.89 (0.62-1.28) | 0.86 (0.59-1.24)            |
|                               |                        | High   | 59       | 17.2  | 0.95 (0.65-1.40) | 0.95 (0.65-1.39)            |
|                               | Valproate (N=589)      | Low    | 30       | 14.63 | 1.00 (ref)       | 1.00 (ref)                  |
|                               |                        | Medium | 37       | 13.96 | 0.96 (0.59-1.56) | 0.92 (0.57-1.48)            |
|                               |                        | High   | 18       | 15.13 | 1.11 (0.62-1.96) | 1.04 (0.59-1.85)            |
| Other somatic                 | Lamotrigine (N=371)    | Low    | 19       | 16.67 | 1.00 (ref)       | 1.00 (ref)                  |
|                               |                        | Medium | 19       | 13.29 | 0.87 (0.47-1.60) | 0.90 (0.47-1.71)            |
|                               |                        | High   | 18       | 15.79 | 0.99 (0.51-1.91) | 1.12 (0.56-2.26)            |
|                               | Carbamazepine (N=325)  | Low    | 14       | 14.89 | 1.00 (ref)       | 1.00 (ref)                  |
|                               |                        | Medium | 30       | 15.31 | 1.01 (0.55-1.86) | 1.65 (0.93-2.91)            |
|                               |                        | High   | 6        | 17.14 | 1.06 (0.43-2.62) | 1.99 (0.81-4.87)            |
|                               | Gabapentin (N=565)     | Low    | 21       | 17.95 | 1.00 (ref)       | 1.00 (ref)                  |
|                               |                        | Medium | 41       | 14.39 | 0.80 (0.49-1.31) | 0.79 (0.48-1.31)            |
|                               |                        | High   | 29       | 17.79 | 0.96 (0.57-1.62) | 0.98 (0.57-1.68)            |
|                               | Valproate (N=216)      | Low    | 11       | 12.09 | 1.00 (ref)       | 1.00 (ref)                  |
|                               |                        | Medium | 8        | 9.2   | 0.80 (0.29-2.24) | 0.84 (0.33-2.17)            |
|                               |                        | High   | 3        | 7.89  | 0.66 (0.17-2.66) | 0.76 (0.18-3.18)            |

**Table S4:** Results from sensitivity analysis

| Sensitivity Analysis                                  | Indication                                        | Exposure            | N miscarriages | N total pregnancies | Percent  | Unadjusted HR (95% CI) | Fully adjusted* HR (95% CI) |
|-------------------------------------------------------|---------------------------------------------------|---------------------|----------------|---------------------|----------|------------------------|-----------------------------|
| Restricted to linked data                             | All women                                         | Unexposed           | 63076          | 524954              | 12.01553 | 1.00 (ref)             | 1.00 (ref)                  |
|                                                       |                                                   | Exposed             | 497            | 3391                | 14.65644 | 1.20 (1.10-            | 1.10 (1.00-1.22)            |
|                                                       | Women with epilepsy                               | Unexposed           | 585            | 4609                | 12.69256 | 1.00 (ref)             | 1.00 (ref)                  |
|                                                       |                                                   | Exposed             | 309            | 2255                | 13.70288 | 1.05 (0.91-            | 1.07 (0.93-1.23)            |
|                                                       | Women with bipolar or other psychiatric disorders | Unexposed           | 24418          | 183406              | 13.31363 | 1.00 (ref)             | 1.00 (ref)                  |
|                                                       |                                                   | Exposed             | 330            | 2021                | 16.32855 | 1.19 (1.07-            | 1.16 (1.03-1.30)            |
|                                                       | Women with other somatic conditions               | Unexposed           | 9632           | 71084               | 13.55017 | 1.00 (ref)             | 1.00 (ref)                  |
|                                                       |                                                   | Exposed             | 176            | 1018                | 17.2888  | 1.26 (1.09-            | 1.19 (1.02-1.39)            |
| Restricted to first pregnancies                       | All women                                         | Unexposed           | 34989          | 322566              | 10.84708 | 1.00 (ref)             | 1.00 (ref)                  |
|                                                       |                                                   | Exposed             | 288            | 2303                | 12.50543 | 1.10 (0.98-            | 1.01 (0.89-1.15)            |
|                                                       | Women with epilepsy                               | Unexposed           | 283            | 2437                | 11.61264 | 1.00 (ref)             | 1.00 (ref)                  |
|                                                       |                                                   | Exposed             | 162            | 1513                | 10.7072  | 0.87 (0.72-            | 0.88 (0.73-1.06)            |
|                                                       | Women with bipolar or other psychiatric disorders | Unexposed           | 10428          | 84063               | 12.40498 | 1.00 (ref)             | 1.00 (ref)                  |
|                                                       |                                                   | Exposed             | 170            | 1195                | 14.22594 | 1.08 (0.93-            | 1.04 (0.88-1.22)            |
|                                                       | Women with other somatic conditions               | Unexposed           | 4109           | 33424               | 12.29356 | 1.00 (ref)             | 1.00 (ref)                  |
|                                                       |                                                   | Exposed             | 81             | 571                 | 14.18564 | 1.10 (0.89-            | 1.07 (0.85-1.35)            |
| Require two prescriptions to be classified as exposed | All women                                         | Unexposed           | 124285         | 1016144             | 12.23104 | 1.00 (ref)             | 1.00 (ref)                  |
|                                                       |                                                   | Exposed             | 850            | 5978                | 14.2188  | 1.10 (1.03-            | 1.02 (0.95-1.10)            |
|                                                       | Women with epilepsy                               | Unexposed           | 1133           | 8543                | 13.26232 | 1.00 (ref)             | 1.00 (ref)                  |
|                                                       |                                                   | Exposed             | 525            | 4022                | 13.05321 | 0.94 (0.85-            | 0.95 (0.86-1.05)            |
|                                                       | Women with bipolar or other psychiatric disorders | Unexposed           | 49222          | 365183              | 13.47872 | 1.00 (ref)             | 1.00 (ref)                  |
|                                                       |                                                   | Exposed             | 566            | 3658                | 15.47294 | 1.07 (0.99-            | 1.04 (0.95-1.13)            |
|                                                       | Women with other somatic conditions               | Unexposed           | 18163          | 132213              | 13.73768 | 1.00 (ref)             | 1.00 (ref)                  |
|                                                       |                                                   | Exposed             | 252            | 1637                | 15.39401 | 1.07 (0.95-            | 1.01 (0.89-1.15)            |
| Split exposed into new and prevalent users            | All women                                         | Unexposed           | 124290         | 1016560             | 12.22653 | 1.00 (ref)             | 1.00 (ref)                  |
|                                                       |                                                   | Exposed - prevalent | 1038           | 7227                | 14.36281 | 1.18 (1.11-            | 1.04 (0.97-1.11)            |
|                                                       |                                                   | Exposed - new user  | 96             | 580                 | 16.55172 | 1.41 (1.17-            | 1.25 (1.04-1.51)            |
|                                                       | Women with epilepsy                               | Unexposed           | 1136           | 8610                | 13.19396 | 1.00 (ref)             | 1.00 (ref)                  |
|                                                       |                                                   | Exposed - prevalent | 611            | 4624                | 13.21367 | 0.98 (0.89-            | 0.98 (0.89-1.08)            |
|                                                       |                                                   | Exposed - new user  | 8              | 84                  | 9.523809 | 0.78 (0.40-            | 0.84 (0.43-1.63)            |
|                                                       | Women with bipolar or other                       | Unexposed           | 49225          | 365499              | 13.46789 | 1.00 (ref)             | 1.00 (ref)                  |

|  |                                     |                     |       |        |          |             |                  |
|--|-------------------------------------|---------------------|-------|--------|----------|-------------|------------------|
|  | psychiatric disorders               | Exposed - prevalent | 705   | 4544   | 15.51497 | 1.15 (1.07- | 1.05 (0.97-1.14) |
|  |                                     | Exposed - new user  | 79    | 443    | 17.83296 | 1.37 (1.12- | 1.29 (1.05-1.58) |
|  | Women with other somatic conditions | Unexposed           | 18164 | 132362 | 13.72297 | 1.00 (ref)  | 1.00 (ref)       |
|  |                                     | Exposed - prevalent |       |        |          | . (-.)      | . (-.)           |
|  |                                     | Exposed - new user  |       |        |          |             |                  |

\*Adjusted for: age, IMD, year of pregnancy, history of pregnancy loss, epilepsy, bipolar, other psychiatric conditions, other somatic conditions.



**Table S5:** Maternal characteristics at start of pregnancy: comparison of those included in the cohort with those excluded due to unknown outcome.

|                                | Pregnancies included, N(%) | Pregnancies excluded due to outcome unknown, N(%) |
|--------------------------------|----------------------------|---------------------------------------------------|
| <b>Total</b>                   | 1023787 (100.0)            | 159765 (100.0)                                    |
| <b>Exposed first trimester</b> | 7832 ( 0.8)                | 1490 ( 0.9)                                       |
| <b>Age in years</b>            |                            |                                                   |
| <18                            | 38216 ( 3.7)               | 6690 ( 4.2)                                       |
| 18-24                          | 231835 (22.6)              | 39188 (24.5)                                      |
| 25-29                          | 265563 (25.9)              | 39395 (24.7)                                      |
| 30-34                          | 285357 (27.9)              | 38694 (24.2)                                      |
| >=35                           | 202816 (19.8)              | 35798 (22.4)                                      |
| <b>IMD quintile</b>            |                            |                                                   |
| 1 (least deprived)             | 194057 (19.0)              | 26804 (16.8)                                      |
| 2                              | 178762 (17.5)              | 25001 (15.6)                                      |
| 3                              | 196900 (19.2)              | 33026 (20.7)                                      |
| 4                              | 208567 (20.4)              | 34730 (21.7)                                      |
| 5 (most deprived)              | 245501 (24.0)              | 40204 (25.2)                                      |
| <b>Ethnicity</b>               |                            |                                                   |
| White                          | 645744 (63.1)              | 79191 (49.6)                                      |
| South Asian                    | 32858 ( 3.2)               | 4997 ( 3.1)                                       |
| Black                          | 17869 ( 1.7)               | 3650 ( 2.3)                                       |
| Other                          | 11580 ( 1.1)               | 1941 ( 1.2)                                       |
| Mixed                          | 6950 ( 0.7)                | 1164 ( 0.7)                                       |
| Not Stated                     | 308786 (30.2)              | 68822 (43.1)                                      |
| <b>Smoking status</b>          |                            |                                                   |
| Non-smoker                     | 415837 (40.6)              | 65191 (40.8)                                      |
| Current smoker                 | 307607 (30.0)              | 50499 (31.6)                                      |
| Ex-smoker                      | 245838 (24.0)              | 33144 (20.7)                                      |
| Not stated                     | 54505 ( 5.3)               | 10931 ( 6.8)                                      |
| <b>BMI</b>                     |                            |                                                   |
| Underweight                    | 32972 ( 3.2)               | 5440 ( 3.4)                                       |
| Normal weight                  | 463975 (45.3)              | 69908 (43.8)                                      |
| Overweight                     | 239081 (23.4)              | 35119 (22.0)                                      |
| Obese                          | 182915 (17.9)              | 27340 (17.1)                                      |
| Not stated                     | 104844 (10.2)              | 21958 (13.7)                                      |
| <b>Year of pregnancy start</b> |                            |                                                   |
| 1995-2000                      | 136079 (13.3)              | 21080 (13.2)                                      |
| 2001-2005                      | 245206 (24.0)              | 32626 (20.4)                                      |
| 2006-2010                      | 305563 (29.8)              | 44571 (27.9)                                      |
| 2011-2015                      | 249123 (24.3)              | 43245 (27.1)                                      |
| 2016-2018                      | 87816 ( 8.6)               | 18243 (11.4)                                      |

|                              |               |              |
|------------------------------|---------------|--------------|
| <b>Problem drinking</b>      | 10176 ( 1.0)  | 1740 ( 1.1)  |
| <b>Illicit drug use</b>      | 2294 ( 0.2)   | 253 ( 0.2)   |
| <b>Consultations *</b>       |               |              |
| 0                            | 83181 ( 8.1)  | 15702 ( 9.8) |
| 1-3                          | 271949 (26.6) | 39535 (24.7) |
| 4-10                         | 439136 (42.9) | 64566 (40.4) |
| >10                          | 229521 (22.4) | 39962 (25.0) |
| <b>Other ASM indications</b> |               |              |
| Epilepsy                     | 13234 ( 1.3)  | 2250 ( 1.4)  |
| Bipolar or other psychiatric | 370043 (36.1) | 58558 (36.7) |
| Other somatic                | 134475 (13.1) | 19759 (12.4) |
|                              |               |              |
| <b>Other prescriptions*</b>  |               |              |
| Antipsychotics               | 808 ( 0.1)    | 163 ( 0.1)   |
| Antidepressants              | 114288 (11.2) | 20984 (13.1) |
| Multivitamins                | 603 ( 0.1)    | 63 ( 0.0)    |
| Folic acid                   | 268760 (26.3) | 30513 (19.1) |
|                              |               |              |
| <b>Comorbidities</b>         |               |              |
| Asthma                       | 171174 (16.7) | 25977 (16.3) |
| CKD                          | 3829 ( 0.4)   | 655 ( 0.4)   |
| Diabetes                     | 7343 ( 0.7)   | 1530 ( 1.0)  |
|                              |               |              |
| <b>Pregnancy history</b>     |               |              |
| <b>Gravidity</b>             |               |              |
| 0                            | 0 ( 0.0)      | 0 ( 0.0)     |
| 1                            | 547263 (53.5) | 0 ( 0.0)     |
| >=2                          | 160526 (15.7) | 0 ( 0.0)     |
| <b>Previous miscarriage</b>  | 100302 ( 9.8) | 8773 ( 5.5)  |
